# Supplementary material for: Association between Maternal Exposure to Chemicals during Pregnancy and the Risk of Foetal Death: The Japan Environment and Children’s Study
Source: MDPI journal article supplement (doi:10.3390/ijerph182211748), 2021-11-09
Supplement: s1 [file s1]

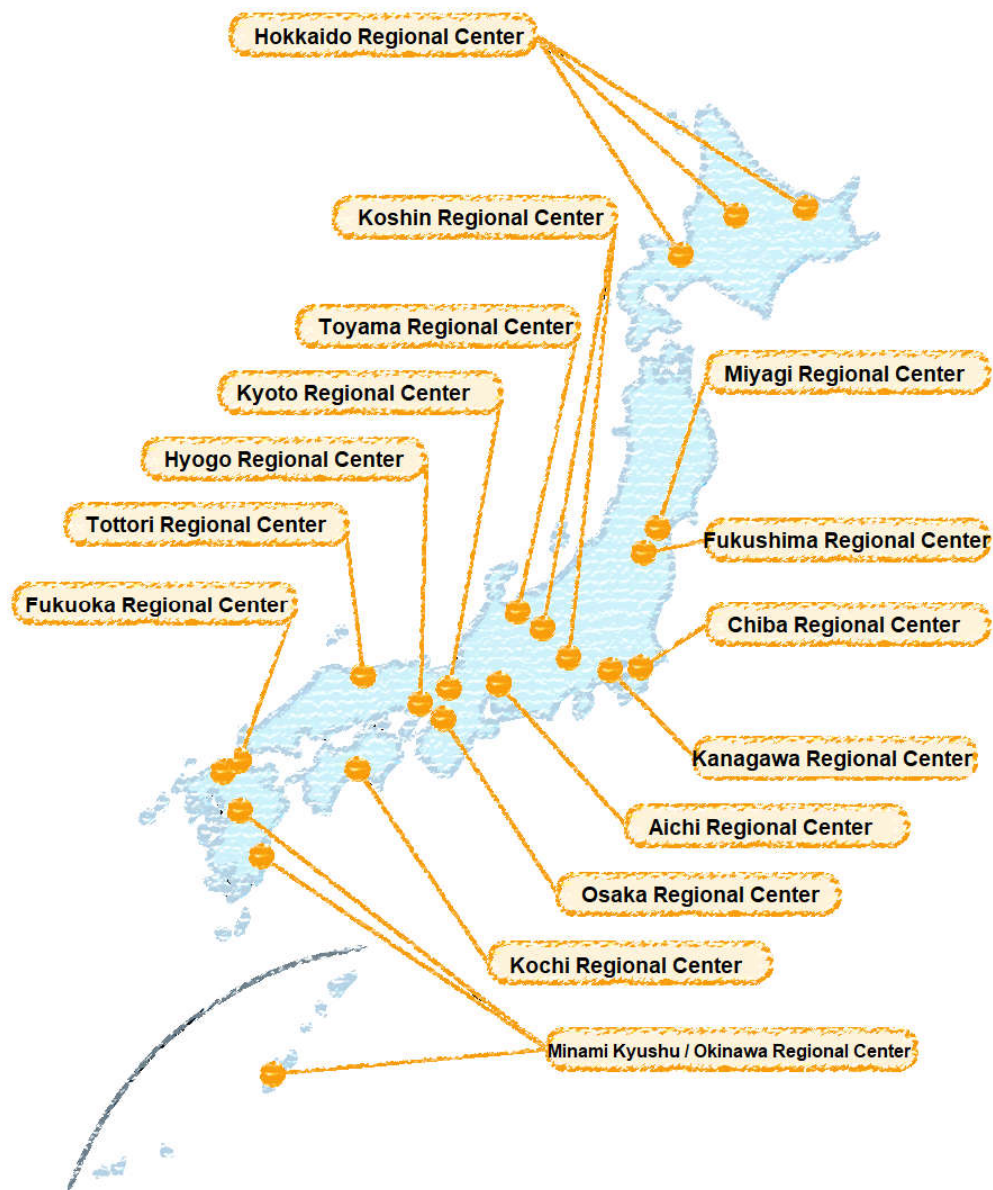

Figure S1. Geographic location of Regional Centres.

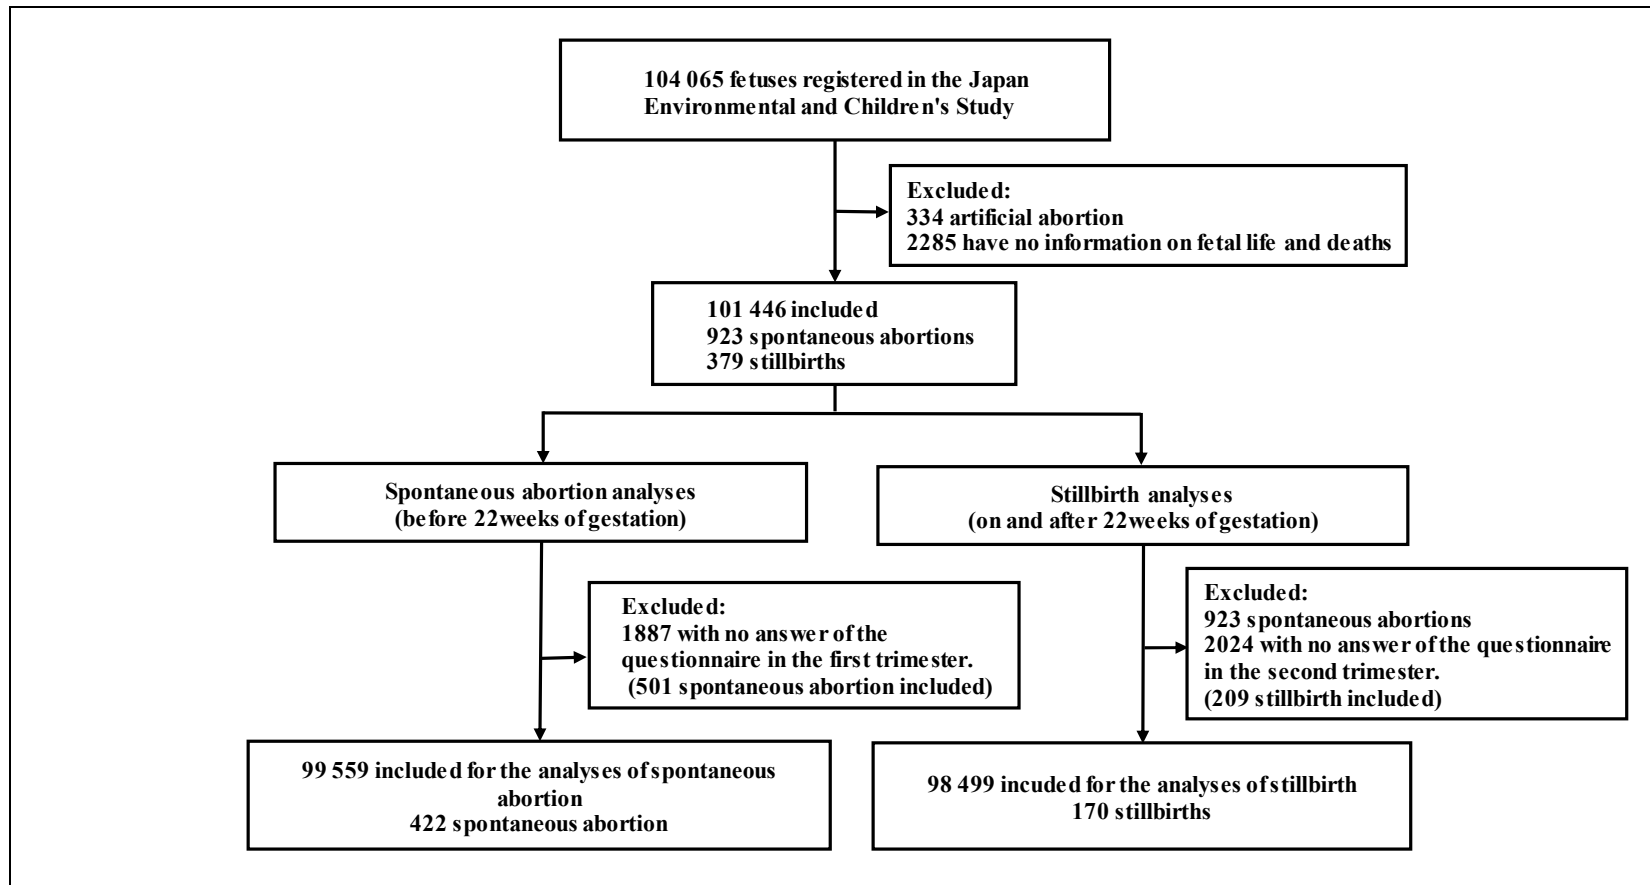

Figure S2. Flowchart of study participant selection.

**Table S1. Summary of questionnaires related to chemical exposure.**

| <b>Questionnaire in the first trimester (12-16 weeks of gestation)</b>        |                                                                                                                                            |
|-------------------------------------------------------------------------------|--------------------------------------------------------------------------------------------------------------------------------------------|
| <b>Variable</b>                                                               | <b>Questions/Frequency options</b>                                                                                                         |
| <b>Occupational exposure</b>                                                  | Please select the frequency of using or handling the following materials during work for more than half a day since becoming pregnant,     |
| Kerosene, Petroleum, Benzene, Gasoline                                        | 1 = Never, 2 = 1 to 3 times a month, 3 = 1 to 6 times a week, 4 = Everyday                                                                 |
| Herbicides or Insecticides                                                    | 1 = Never, 2 = 1 to 3 times a month, 3 = 1 to 6 times a week, 4 = Everyday                                                                 |
| Hair dye                                                                      | 1 = Never, 2 = 1 to 3 times a month, 3 = 1 to 6 times a week, 4 = Everyday                                                                 |
| Chlorine bleach, Germicide                                                    | 1 = Never, 2 = 1 to 3 times a month, 3 = 1 to 6 times a week, 4 = Everyday                                                                 |
| <b>Questionnaire in the second/third trimester (22-28 weeks of gestation)</b> |                                                                                                                                            |
| <b>Variable</b>                                                               | <b>Questions/Frequency options</b>                                                                                                         |
| <b>Occupational exposure</b>                                                  | Please select the frequency of using or handling the following materials during work for more than half a day since becoming pregnant,     |
| Kerosene, Petroleum, Benzene, Gasoline                                        | 1 = Never, 2 = 1 to 3 times a month, 3 = 1 to 6 times a week, 4 = Everyday                                                                 |
| Herbicides or Insecticides                                                    | 1 = Never, 2 = 1 to 3 times a month, 3 = 1 to 6 times a week, 4 = Everyday                                                                 |
| Hair dye                                                                      | 1 = Never, 2 = 1 to 3 times a month, 3 = 1 to 6 times a week, 4 = Everyday                                                                 |
| Chlorine bleach, Germicide                                                    | 1 = Never, 2 = 1 to 3 times a month, 3 = 1 to 6 times a week, 4 = Everyday                                                                 |
| <b>Exposure in daily life</b>                                                 | Please select the frequency of using or handling the following materials since becoming pregnant                                           |
|                                                                               | Refuelling a car with gasoline at a self-service gas station                                                                               |
| Gasoline                                                                      | 1 = Everyday, 2 = 4-6 times a week, 3 = 2-3 times a week, 4 = Once a week,<br>5 = 1-3 times a month, 6 = Less than once a month, 7 = Never |

|                                  |                                                                                                                                                                                                 |
|----------------------------------|-------------------------------------------------------------------------------------------------------------------------------------------------------------------------------------------------|
| Herbicides or Insecticides       | <p>Using a herbicide or a gardening pesticide in a garden, balcony, or farm</p> <p>1 = Everyday, 2 = A few times a week, 3 = Once a week, 4 = 1-3 times a month, 5 = Less than once a month</p> |
| Hair dye: for home use           | <p>Using of hair colouring products (hair dye) or perm solutions at home</p> <p>1 = Quite often, 2 = Sometimes, 3 = Rarely, 4 = Never</p>                                                       |
| Hair dye: for use in hair salons | <p>Colouring or perming hair at a beauty salon</p> <p>1 = Quite often, 2 = Sometimes, 3 = Rarely, 4 = Never</p>                                                                                 |

**Table S2. Sensitivity analysis of adjusted odds ratios for stillbirth occurrences for occupational exposures from the first to the second/third trimester.**

| Type and frequency of exposure*                                           | No. of stillbirths /     |                  | Crude model      |             | Adjusted model**  |             |
|---------------------------------------------------------------------------|--------------------------|------------------|------------------|-------------|-------------------|-------------|
|                                                                           | total no. of pregnancies | Rate/1000 births | OR (95% CI)      | p for trend | OR (95% CI)       | p for trend |
| <b>Occupational exposure from the first to the second/third trimester</b> |                          |                  |                  |             |                   |             |
| Kerosene, Petroleum, Benzene, or Gasoline                                 | n = 324/97 886           | 3.3              |                  |             |                   |             |
| Not at all                                                                | 272/81 583               | 3.3              | ref.             |             | ref.              |             |
| 1–3 times a month                                                         | 40/12 777                | 3.1              | 0.93 (0.67–1.31) | 0.85        | 1.05 (0.64–1.74)  | 0.99        |
| once a week and over                                                      | 12/3526                  | 3.4              | 1.02 (0.57–1.82) |             | 0.90 (0.33–2.46)  |             |
| Herbicides or Insecticides                                                | n = 323/97 623           | 3.3              |                  |             |                   |             |
| Not at all                                                                | 296/89 019               | 3.3              | ref.             |             | ref.              |             |
| 1–3 times a month                                                         | 25/7430                  | 3.4              | 1.01 (0.67–1.52) | 0.58        | 1.41 (0.81–2.46)  | 0.27        |
| once a week and over                                                      | 2/1174                   | 1.7              | 0.51 (0.13–2.05) |             | 1.23 (0.30–5.02)  |             |
| Hair dye                                                                  | n = 325/97 626           | 3.3              |                  |             |                   |             |
| Not at all                                                                | 285/87 965               | 3.2              | ref.             |             | ref.              |             |
| 1–3 times a month                                                         | 30/8716                  | 3.4              | 1.06 (0.73–1.55) | 0.0090      | 1.11 (0.61–2.02)  | 0.00034     |
| 1–6 times a week                                                          | 6/554                    | 10.8             | 3.37 (1.49–7.59) |             | 6.44 (2.33–17.81) |             |
| Everyday                                                                  | 4/391                    | 10.2             | 3.18 (1.18–8.57) |             | 7.47 (2.29–24.38) |             |
| Chlorine bleach or Germicide                                              | n=325/97 920             | 3.3              |                  |             |                   |             |
| Not at all                                                                | 252/72 159               | 3.5              | ref.             | 0.57        | ref.              | 0.65        |
| 1–3 times a month                                                         | 46/19 347                | 2.4              | 0.68 (0.5–0.93)  |             | 0.9 (0.58–1.39)   |             |

|                  |         |     |                  |                  |
|------------------|---------|-----|------------------|------------------|
| 1–6 times a week | 24/5667 | 4·2 | 1·21 (0·8–1·85)  | 0·90 (0·42–1·94) |
| Everyday         | 3/747   | 4·0 | 1·15 (0·37–3·60) | 0·97 (0·14–7·03) |

\*Compensating for deficiencies in the questionnaire of occupational exposure during the second/third trimester with answers to the same questionnaire in the first trimester. The response concordance rates of ‘Kerosene, Petroleum, Benzene, or Gasoline’, ‘Herbicides or Insecticides’, ‘Hair dye’, and ‘Chlorine bleach or Germicide’ between the first and second/third trimester’s questionnaires for the same pregnant women are 72·7%, 89·0%, 89·3%, and 82·8%, respectively.

\*\*Adjusted for age, BMI, pre-pregnancy type 2 diabetes/hypertension, smoking/drinking during the second trimester, working hours per week, sitting time per day, K6, parity, multiple births, household income, and educational background of parents.
